# Supplementary material for: Omicron variant neutralizing antibodies following BNT162b2 BA.4/5 versus mRNA-1273 BA.1 bivalent vaccination in patients with end-stage kidney disease
Source: PubMed Central journal article supplement (PMC10533557; doi:10.1038/s41467-023-41678-9), 2023-09-27
Supplement: 41467_2023_41678_MOESM1_ESM.pdf [file 41467_2023_41678_MOESM1_ESM.pdf]

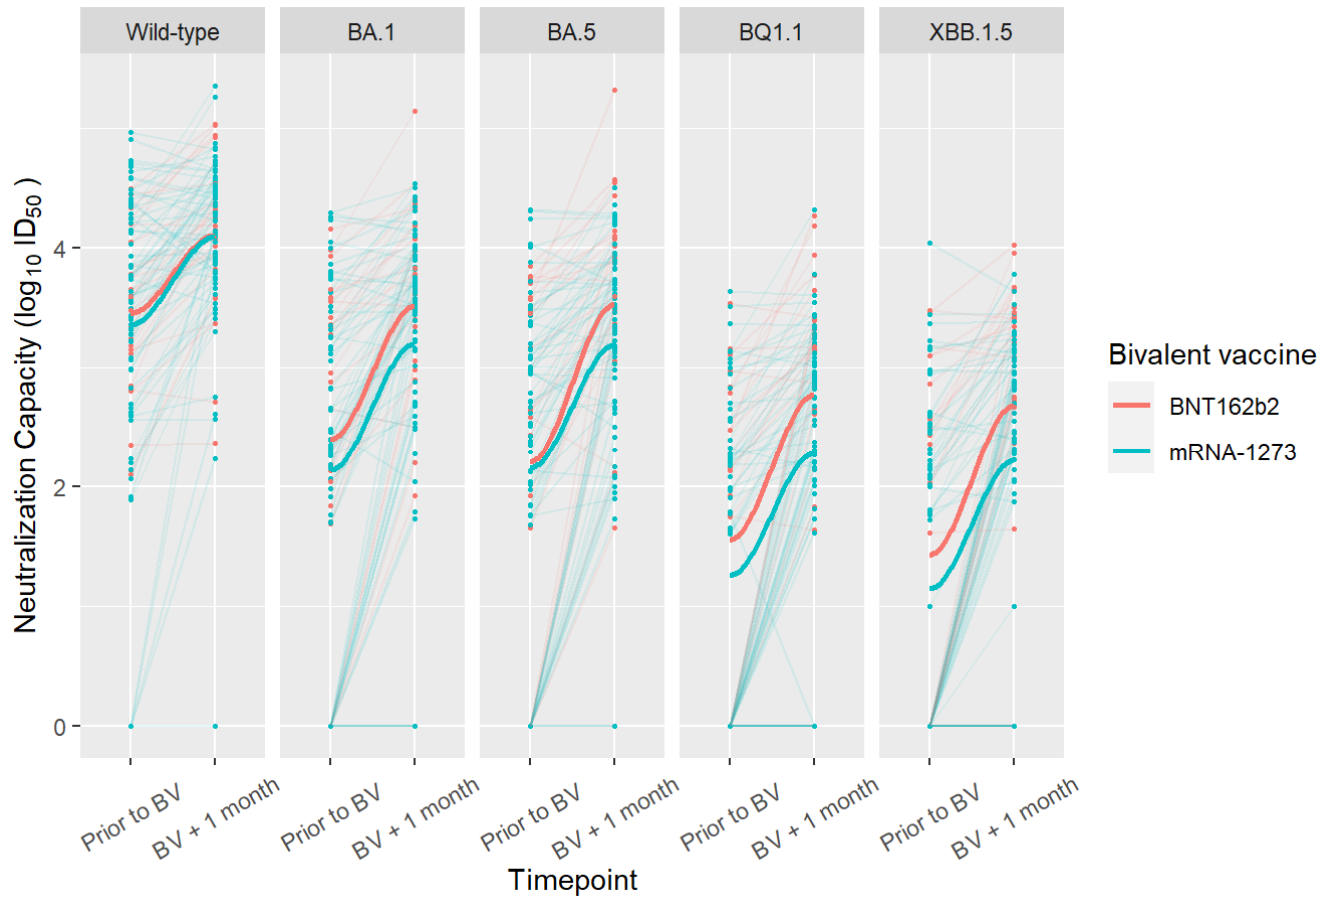

1

2 **Supplementary Fig 1 | Neutralizing antibody trajectories for wild-type, BA.1, BA.5, BQ.1.1,**  
 3 **and XBB.1.5 subvariants prior to and one month following bivalent vaccination with**  
 4 **BNT162b2 BA.4/5 (n=26) or mRNA-1273 BA.1 (n=72).** Differences by vaccine type were not  
 5 statistically different after adjustment for baseline neutralizing antibody levels, anti-nucleocapsid  
 6 positivity, patient type, and number of vaccine doses: Wild-type (P=0.48), BA.1 (P=0.21), BA.5  
 7 (P=0.069), BQ.1.1 (P=0.10), nor XBB.1.5 (P=0.099). Dots represent individual serum samples  
 8 collected (n=98 for each time point). Results were analysed using a linear mixed effects model,  
 9 with a two-sided p-value. No adjustments were made for multiple comparisons.

10

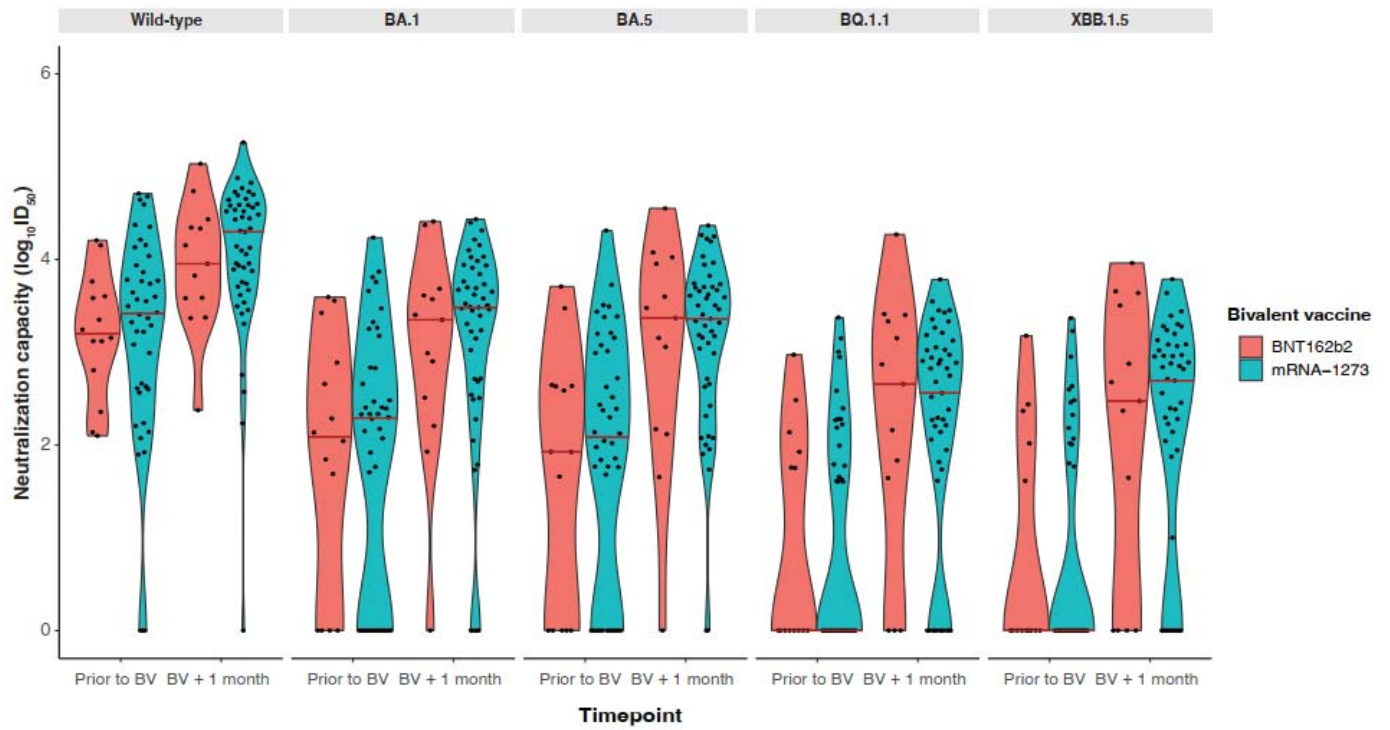

11  
 12 **Supplementary Fig 2 | Neutralizing antibodies against wild-type, BA.1, BA.5, BQ.1.1, and**  
 13 **XBB.1.5 by bivalent vaccine type in hemodialysis patients: BNT162b2 BA.4/5 (n=14) versus**  
 14 **mRNA-1273 (n=44) after exclusion of participants with a positive anti-nucleocapsid**  
 15 **antibody.** Solid red line indicates median level. Dots represent individual serum samples  
 16 collected (n=58). Results were analysed using a linear mixed effects model, with a two-sided p-  
 17 value. No adjustments were made for multiple comparisons.

18

19  
20  
21

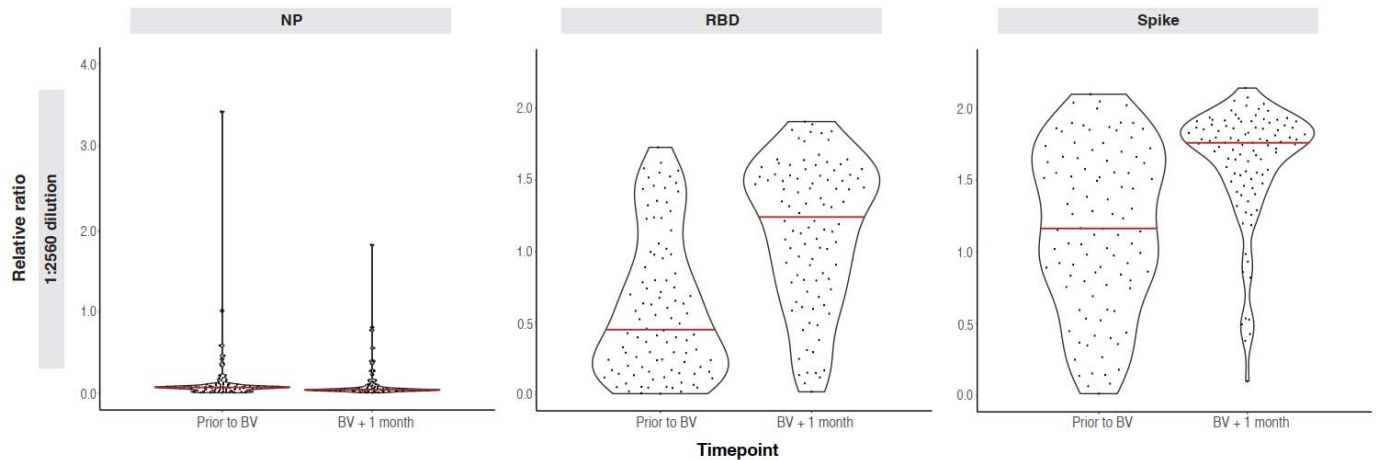

22  
23

24 **Supplementary Fig 3 | SARS-CoV-2 IgG nucleocapsid, RBD and Spike Binding Antibody**  
25 **Response.** Dots represent individual serum samples collected (n=98 for each timepoint). Solid  
26 red line indicates median level. Antibody levels are reported as relative ratios to synthetic  
27 standards. Upper limit of the linear range for the relative ratio is 2 for nucleocapsid, 1.2 for RBD  
28 and 1.2 for Spike. Anti-RBD increased from 0.45 (IQR 0.18, 0.97) to 1.24 (IQR 0.80, 1.53) 1-  
29 month post-vaccination and anti-spike increased from 1.16 (IQR 0.77, 1.65) to 1.76 (IQR  
30 1.52,1.86) 1-month post-vaccination ( $p < 0.0001$  for difference prior and 1 month following  
31 bivalent vaccination). Abbreviations: BV, bivalent; N, nucleocapsid protein; RBD, receptor  
32 binding domain.

33

34 **Supplementary Table 1 | Anti-nucleocapsid IgG seropositivity and seroconversion prior to**  
35 **and 1 month following bivalent vaccination.**

36

| <b>Timepoint</b>           | <b>Anti-Nucleocapsid IgG Seropositivity</b> |
|----------------------------|---------------------------------------------|
| Pre-Bivalent               | 40/98 (41%)                                 |
| Bivalent Vaccine + 1 month | 36/98 (37%)                                 |

37 At follow-up, one seroconversion for anti-nucleocapsid IgG occurred and 5 participants initially seropositive for anti-nucleocapsid IgG became  
38 seronegative.

39

40

41 **Supplementary Table 2 | Neutralizing and total antibody levels in overall cohort prior to**  
 42 **and following bivalent vaccination.**  
 43

| <b>Variable</b>                        | <b>Pre-Bivalent<br/>(n= 98)*</b> | <b>Post-Bivalent<br/>(n= 98)</b> | <b>Overall<br/>(n= 196)</b> |
|----------------------------------------|----------------------------------|----------------------------------|-----------------------------|
| <b>Wild-type neutralization</b>        | 93 (95%)                         | 97 (99%)                         | 190 (97%)                   |
| <b>Wild-type log<sub>10</sub> ID50</b> | 3.59 (2.99, 4.15)                | 4.25 (3.81, 4.54)                | 3.93 (3.37, 4.42)           |
| <b>BA.1 neutralization</b>             | 74 (76%)                         | 91 (93%)                         | 165 (84%)                   |
| <b>BA.1 log<sub>10</sub> ID50</b>      | 2.37 (1.69, 3.35)                | 3.59 (2.92, 3.98)                | 3.23 (2.19, 3.76)           |
| <b>BA.5 neutralization</b>             | 73 (74%)                         | 94 (96%)                         | 167 (85%)                   |
| <b>BA.5 log<sub>10</sub> ID50</b>      | 2.61 (0.41, 3.20)                | 3.53 (3.00, 3.92)                | 3.13 (2.09, 3.70)           |
| <b>BQ.1.1 neutralization</b>           | 54 (55%)                         | 82 (84%)                         | 136 (69%)                   |
| <b>BQ.1.1 log<sub>10</sub> ID50</b>    | 1.70 (0.00, 2.38)                | 2.86 (2.06, 3.23)                | 2.23 (0.00, 2.98)           |
| <b>XBB.1.5 neutralization</b>          | 47 (48%)                         | 79 (81%)                         | 126 (64%)                   |
| <b>XBB.1.5 log<sub>10</sub>ID50</b>    | 0.00 (0.00, 2.45)                | 2.83 (2.05, 3.24)                | 2.28 (0.00, 3.02)           |
| <b>Anti-RBD IgG, relative ratio</b>    | 0.45 (0.18, 0.97)                | 1.24 (0.80, 1.53)                | 0.84 (0.33, 1.44)           |
| <b>Anti-Spike IgG, relative ratio</b>  | 1.16 (0.77, 1.65)                | 1.76 (1.52, 1.86)                | 1.56 (1.01, 1.81)           |
| <b>Anti-N positive</b>                 | 40 (41%)                         | 36 (37%)                         | 76 (39%)                    |
| *Median (IQR); n (%)                   |                                  |                                  |                             |

44  
 45 Abbreviations: Anti-N, anti-nucleocapsid, anti-RBD, anti-receptor binding domain; Relative ratios above 1.2 may be underestimated due to assay  
 46 saturation.

47 **Supplementary Table 3 | Fold decrease in neutralization in comparison to wild-type**  
 48 **(D614G)**  
 49

|                                                    | <b>Pre-Bivalent<br/>mRNA-1273<br/>(n=72)</b> | <b>Post Bivalent<br/>mRNA-1273<br/>(n=72)</b> | <b>Pre-Bivalent<br/>BNT162b2<br/>(n=26)</b> | <b>Post Bivalent<br/>BNT162b2<br/>(n=26)</b> | <b>Total<br/>(n=196)</b> |
|----------------------------------------------------|----------------------------------------------|-----------------------------------------------|---------------------------------------------|----------------------------------------------|--------------------------|
| <b>Median BA.1 Fold<br/>Decrease [IQR]*</b>        | 12.2 (60.4)                                  | 5.58 (9.3)                                    | 7.2 (31.7)                                  | 3.74 (5.1)                                   | 7.3 (17.5)               |
| <b>Median BA.5 Fold<br/>Decrease [IQR]</b>         | 12.8 (37.9)                                  | 7.6 (12.4)                                    | 9.1 (99.1)                                  | 3.1 (5.1)                                    | 8.3 (19.2)               |
| <b>Median BQ.1.1<br/>Fold Decrease<br/>[IQR]</b>   | 85.4 (436.4)                                 | 39.0 (92.1)                                   | 45.5 (510.4)                                | 17.6 (25.5)                                  | 45.8 (170.3)             |
| <b>Median XBB.1.5.<br/>Fold Decrease<br/>[IQR]</b> | 108.3 (1282.7)                               | 42.3 (60.5)                                   | 74.5 (1140.6)                               | 18.7 (25.9)                                  | 48.2 (376.7)             |

50

51 \* Fold changes are expressed in comparison to wild-type (D614G) ancestral SARS-CoV-2.

52

53 **Supplementary Table 4 | Neutralizing antibody capacity against wild-type, B.1.1.529**  
 54 **Omicron subvariants following bivalent mRNA COVID-19 vaccination by bivalent vaccine**  
 55 **type.**  
 56

| Variable                               | Overall<br>(n = 98)* | mRNA-1273<br>(n= 72)* | BNT162b2<br>(n= 26)* |
|----------------------------------------|----------------------|-----------------------|----------------------|
| <b>Wild-type neutralization</b>        | 97 (99%)             | 71 (99%)              | 26 (100%)            |
| <b>Wild-type log<sub>10</sub> ID50</b> | 4.25 (3.81, 4.54)    | 4.25 (3.81, 4.56)     | 4.22 (3.85, 4.43)    |
| <b>BA.1 neutralization</b>             | 91 (93%)             | 66 (92%)              | 25 (96%)             |
| <b>BA.1 log<sub>10</sub> ID50</b>      | 3.59 (2.92, 3.98)    | 3.54 (2.78, 3.93)     | 3.73 (3.13, 4.16)    |
| <b>BA.5 neutralization</b>             | 94 (96%)             | 69 (96%)              | 25 (96%)             |
| <b>BA.5 log<sub>10</sub> ID50</b>      | 3.53 (3.00, 3.92)    | 3.48 (2.72, 3.73)     | 3.80 (3.35, 4.08)    |
| <b>BQ.1.1 neutralization</b>           | 82 (84%)             | 59 (82%)              | 23 (88%)             |
| <b>BQ.1.1 log<sub>10</sub> ID50</b>    | 2.86 (2.06, 3.23)    | 2.71 (1.99, 3.12)     | 3.16 (2.62, 3.41)    |
| <b>XBB.1.5 neutralization</b>          | 79 (81%)             | 57 (79%)              | 22 (85%)             |
| <b>XBB.1.5 log<sub>10</sub>ID50</b>    | 2.83 (2.05, 3.24)    | 2.69 (1.93, 3.13)     | 3.16 (2.52, 3.49)    |
| <b>COVID-19 vaccine dose number</b>    |                      |                       |                      |
| 4                                      | 8 (8.2%)             | 6 (8.3%)              | 2 (7.7%)             |
| 5                                      | 90 (92%)             | 66 (92%)              | 24 (92%)             |
| <b>Prior COVID-19</b>                  | 25 (26%)             | 19 (26%)              | 6 (23%)              |
| * n (%); Median (IQR)                  |                      |                       |                      |

57

58 **Supplementary Table 5 | Neutralizing antibody response differences between BNT162b2**  
59 **BA.4/5 vaccine and mRNA-1273 BA.1 vaccine while accounting for initial two dose vaccine**  
60 **type, third vaccine dose type, anti-nucleocapsid status, number of vaccine doses, patient**  
61 **type, and anti-nucleocapsid positivity**

| <b>Variant of Concern</b> | <b>p-value</b> |
|---------------------------|----------------|
| Wild-Type                 | 0.26           |
| BA.1                      | 0.49           |
| BA.5                      | 0.23           |
| BQ.1.1                    | 0.50           |
| XBB.1.5                   | 0.39           |

62

63



64 **Supplementary Table 6 | Neutralizing antibody capacity against wild-type, B.1.1.529**  
 65 **Omicron subvariants following bivalent mRNA COVID-19 vaccination by number of total**  
 66 **vaccine doses.**  
 67

| <b>Variable</b>                        | <b>Overall<br/>(n= 98)*</b> | <b>Four Doses<br/>(n=8)*</b> | <b>Five Doses<br/>(n=90)*</b> |
|----------------------------------------|-----------------------------|------------------------------|-------------------------------|
| <b>Wild-type neutralization</b>        | 97 (99%)                    | 8 (100%)                     | 89 (99%)                      |
| <b>Wild-type log<sub>10</sub> ID50</b> | 4.25 (3.81, 4.54)           | 4.19 (3.94, 4.26)            | 4.28 (3.81, 4.55)             |
| <b>BA.1 neutralization</b>             | 91 (93%)                    | 8 (100%)                     | 83 (92%)                      |
| <b>BA.1 log<sub>10</sub> ID50</b>      | 3.59 (2.92, 3.98)           | 3.74 (3.40, 4.16)            | 3.59 (2.89, 3.97)             |
| <b>BA.5 neutralization</b>             | 94 (96%)                    | 8 (100%)                     | 86 (96%)                      |
| <b>BA.5 log<sub>10</sub> ID50</b>      | 3.53 (3.00, 3.92)           | 3.60 (3.34, 4.08)            | 3.53 (2.94, 3.90)             |
| <b>BQ.1.1 neutralization</b>           | 82 (84%)                    | 7 (88%)                      | 75 (83%)                      |
| <b>BQ.1.1 log<sub>10</sub> ID50</b>    | 2.86 (2.06, 3.23)           | 2.93 (2.72, 3.33)            | 2.82 (2.02, 3.21)             |
| <b>XBB.1.5 neutralization</b>          | 79 (81%)                    | 7 (88%)                      | 72 (80%)                      |
| <b>XBB.1.5 log<sub>10</sub>ID50</b>    | 2.83 (2.05, 3.24)           | 2.72 (2.57, 3.32)            | 2.84 (1.97, 3.23)             |
| <b>Bivalent Vaccine Type</b>           |                             |                              |                               |
| mRNA-1273                              | 72 (73%)                    | 6 (75%)                      | 66 (73%)                      |
| BNT162b2                               | 26 (27%)                    | 2 (25%)                      | 24 (27%)                      |
| <b>Patient Type</b>                    |                             |                              |                               |
| HD                                     | 83 (85%)                    | 8 (100%)                     | 75 (83%)                      |
| Kidney Transplant                      | 15 (15%)                    | 0 (0%)                       | 15 (17%)                      |
| <b>Prior COVID-19</b>                  | 25 (26%)                    | 5 (62%)                      | 20 (22%)                      |
| * n (%); Median (IQR)                  |                             |                              |                               |

68  
 69 Abbreviations: HD, hemodialysis.

70  
 71  
 72  
 73  
 74  
 75  
 76

77 **Supplementary Table 7 | Neutralizing antibody capacity against wild-type, B.1.1.529**  
 78 **Omicron subvariants following bivalent mRNA COVID-19 vaccination by COVID-19**  
 79 **status.**  
 80

| <b>Variable</b>                        | <b>Overall<br/>(n = 98)*</b> | <b>No COVID-19<br/>(n= 73)*</b> | <b>Prior COVID-19<br/>(n=25)*</b> |
|----------------------------------------|------------------------------|---------------------------------|-----------------------------------|
| <b>Wild-type neutralization</b>        | 97 (99%)                     | 73 (100%)                       | 24 (96%)                          |
| <b>Wild-type log<sub>10</sub> ID50</b> | 4.25 (3.81, 4.54)            | 4.27 (3.79, 4.59)               | 4.22 (3.93, 4.42)                 |
| <b>BA.1 neutralization</b>             | 91 (93%)                     | 67 (92%)                        | 24 (96%)                          |
| <b>BA.1 log<sub>10</sub> ID50</b>      | 3.59 (2.92, 3.98)            | 3.52 (2.71, 3.93)               | 3.82 (3.51, 4.00)                 |
| <b>BA.5 neutralization</b>             | 94 (96%)                     | 69 (95%)                        | 25 (100%)                         |
| <b>BA.5 log<sub>10</sub> ID50</b>      | 3.53 (3.00, 3.92)            | 3.37 (2.67, 3.88)               | 3.70 (3.53, 3.95)                 |
| <b>BQ.1.1 neutralization</b>           | 82 (84%)                     | 58 (79%)                        | 24 (96%)                          |
| <b>BQ.1.1 log<sub>10</sub> ID50</b>    | 2.86 (2.06, 3.23)            | 2.68 (1.74, 3.18)               | 3.03 (2.63, 3.29)                 |
| <b>XBB.1.5 neutralization</b>          | 79 (81%)                     | 56 (77%)                        | 23 (92%)                          |
| <b>XBB.1.5 log<sub>10</sub>ID50</b>    | 2.83 (2.05, 3.24)            | 2.71 (1.65, 3.24)               | 3.02 (2.56, 3.30)                 |
| <b>Dose Bivalent Vaccine</b>           |                              |                                 |                                   |
| 4                                      | 8 (8.2%)                     | 3 (4.1%)                        | 5 (20%)                           |
| 5                                      | 90 (92%)                     | 70 (96%)                        | 20 (80%)                          |
| <b>Bivalent Vaccine Type</b>           |                              |                                 |                                   |
| mRNA-1273                              | 72 (73%)                     | 53 (73%)                        | 19 (76%)                          |
| BNT162b2                               | 26 (27%)                     | 20 (27%)                        | 6 (24%)                           |
| * n (%); Median (IQR)                  |                              |                                 |                                   |

81

82 **Supplementary Table 8 | Neutralizing antibody capacity against wild-type, B.1.1.529**  
 83 **(Omicron subvariants following bivalent mRNA COVID-19 vaccination by patient type.**  
 84

| <b>Variable</b>                        | <b>Overall<br/>(n= 98)*</b> | <b>HD<br/>(n= 83)*</b> | <b>Kidney Transplant<br/>(n=15)*</b> |
|----------------------------------------|-----------------------------|------------------------|--------------------------------------|
| <b>Wild-type neutralization</b>        | 97 (99%)                    | 82 (99%)               | 15 (100%)                            |
| <b>Wild-type log<sub>10</sub> ID50</b> | 4.25 (3.81, 4.54)           | 4.27 (3.79, 4.57)      | 4.10 (3.84, 4.38)                    |
| <b>BA.1 neutralization</b>             | 91 (93%)                    | 78 (94%)               | 13 (87%)                             |
| <b>BA.1 log<sub>10</sub> ID50</b>      | 3.59 (2.92, 3.98)           | 3.65 (3.11, 4.00)      | 3.15 (2.44, 3.63)                    |
| <b>BA.5 neutralization</b>             | 94 (96%)                    | 80 (96%)               | 14 (93%)                             |
| <b>BA.5 log<sub>10</sub> ID50</b>      | 3.53 (3.00, 3.92)           | 3.59 (3.11, 3.95)      | 3.13 (2.61, 3.52)                    |
| <b>BQ.1.1 neutralization</b>           | 82 (84%)                    | 73 (88%)               | 9 (60%)                              |
| <b>BQ.1.1 log<sub>10</sub> ID50</b>    | 2.86 (2.06, 3.23)           | 2.91 (2.16, 3.27)      | 2.21 (0.00, 2.75)                    |
| <b>XBB.1.5 neutralization</b>          | 79 (81%)                    | 69 (83%)               | 10 (67%)                             |
| <b>XBB.1.5 log<sub>10</sub>ID50</b>    | 2.83 (2.05, 3.24)           | 2.88 (2.29, 3.28)      | 2.06 (0.00, 2.76)                    |
| <b>Dose Bivalent Vaccine</b>           |                             |                        |                                      |
| 4                                      | 8 (8.2%)                    | 8 (9.6%)               | 0 (0%)                               |
| 5                                      | 90 (92%)                    | 75 (90%)               | 15 (100%)                            |
| <b>Bivalent Vaccine Type</b>           |                             |                        |                                      |
| mRNA-1273                              | 72 (73%)                    | 57 (69%)               | 15 (100%)                            |
| BNT162b2                               | 26 (27%)                    | 26 (31%)               | 0 (0%)                               |
| <b>Prior COVID-19</b>                  | 25 (26%)                    | 23 (28%)               | 2 (13%)                              |
| * n (%); Median (IQR)                  |                             |                        |                                      |

85 Abbreviations: HD, hemodialysis.

86

87
